# Supplementary material for: Modulating edible-oleogels physical and functional characteristics by controlling their microstructure
Source: Royal Society of Chemistry journal article supplement (doi:10.1039/d3fo03491g), 2023-12-13
Supplement: d3fo03491g1.pdf [file d3fo03491g1.pdf]

Supplementary Material to:

---

## Modulating edible-oleogels physical and functional characteristics by controlling their microstructure

**Mohsen Ramezani**<sup>ab</sup>, **Laura Salvia-Trujillo**<sup>ab</sup>, **Olga Martín-Belloso**<sup>\*ab</sup>

<sup>a</sup>. Department of Food Technology, Engineering and Science. University of Lleida, Av. Alcalde Rovira Roure 191, 25198. Lleida, Spain

<sup>b</sup>. Agrotecnio Center, Av. Alcalde Rovira Roure 191, 25198. Lleida, Spain

**Table S1. Composition of oleogels formulated with corn oil, glyceryl stearate (GS),  $\beta$ -carotene ( $\beta$ C), water (W), and varying concentrations of lecithin (L) or hydrogenated**

| <b>Component</b>         | <b>Corn oil (g)</b> | <b>GS (g)</b> | <b>W (ml)</b> | <b>L (g)</b> | <b>HL (g)</b> | <b><math>\beta</math>C (g)</b> |
|--------------------------|---------------------|---------------|---------------|--------------|---------------|--------------------------------|
| GS                       | 32.0                | 8             | 0             | 0            | 0             | 0                              |
| GS-L (0.5%)              | 31.8                | 8             | 0             | 0.2          | 0             | 0                              |
| GS-L (1%)                | 31.6                | 8             | 0             | 0.4          | 0             | 0                              |
| GS-L (1.5%)              | 31.4                | 8             | 0             | 0.6          | 0             | 0                              |
| GS-L (2%)                | 31.2                | 8             | 0             | 0.8          | 0             | 0                              |
| GS-L (2.5%)              | 31.0                | 8             | 0             | 1.0          | 0             | 0                              |
| GS-HL (0.5%)             | 31.8                | 8             | 0             | 0            | 0.2           | 0                              |
| GS-HL (1%)               | 31.6                | 8             | 0             | 0            | 0.4           | 0                              |
| GS-HL (1.5%)             | 31.4                | 8             | 0             | 0            | 0.6           | 0                              |
| GS-HL (2%)               | 31.2                | 8             | 0             | 0            | 0.8           | 0                              |
| GS-HL (2.5%)             | 31.0                | 8             | 0             | 0            | 1.0           | 0                              |
| W-GS                     | 31.6                | 8             | 0.4           | 0            | 0             | 0                              |
| W-GS-L (0.5%)            | 31.4                | 8             | 0.4           | 0.2          | 0             | 0                              |
| W-GS-L (1%)              | 31.2                | 8             | 0.4           | 0.4          | 0             | 0                              |
| W-GS-L (1.5%)            | 31.0                | 8             | 0.4           | 0.6          | 0             | 0                              |
| W-GS-L (2%)              | 30.8                | 8             | 0.4           | 0.8          | 0             | 0                              |
| W-GS-L (2.5%)            | 30.6                | 8             | 0.4           | 1.0          | 0             | 0                              |
| W-GS-HL (0.5%)           | 31.4                | 8             | 0.4           | 0            | 0.2           | 0                              |
| W-GS-HL (1%)             | 31.2                | 8             | 0.4           | 0            | 0.4           | 0                              |
| W-GS-HL (1.5%)           | 31.0                | 8             | 0.4           | 0            | 0.6           | 0                              |
| W-GS-HL (2%)             | 30.8                | 8             | 0.4           | 0            | 0.8           | 0                              |
| W-GS-HL (2.5%)           | 30.6                | 8             | 0.4           | 0            | 1.0           | 0                              |
| $\beta$ C-GS             | 32.0                | 8             | 0             | 0            | 0             | 0.0320                         |
| $\beta$ C-GS-L (0.5%)    | 31.8                | 8             | 0             | 0.2          | 0             | 0.0318                         |
| $\beta$ C-GS-L (2.5%)    | 31.0                | 8             | 0             | 1.0          | 0             | 0.0310                         |
| $\beta$ C-GS-HL (0.5%)   | 31.8                | 8             | 0             | 0            | 0.2           | 0.0318                         |
| $\beta$ C-GS-HL (2.5%)   | 31.0                | 8             | 0             | 0            | 1.0           | 0.0310                         |
| $\beta$ C-W-GS           | 31.6                | 8             | 0.4           | 0            | 0             | 0.0316                         |
| $\beta$ C-W-GS-L (0.5%)  | 31.4                | 8             | 0.4           | 0.2          | 0             | 0.0314                         |
| $\beta$ C-W-GS-L (2.5%)  | 30.6                | 8             | 0.4           | 1.0          | 0             | 0.0306                         |
| $\beta$ C-W-GS-HL (0.5%) | 31.4                | 8             | 0.4           | 0            | 0.2           | 0.0314                         |
| $\beta$ C-W-GS-HL (2.5%) | 30.6                | 8             | 0.4           | 0            | 1.0           | 0.0306                         |

lecithin (HL).



**Table S2. Thermal parameters of neat lecithin (L), hydrogenated lecithin (HL), and glyceryl stearate (GS) with the melting (T<sub>m</sub>) or crystallization (T<sub>c</sub>) temperatures (°C), as well as the corresponding difference in enthalpy ΔH (j/g) respecting the second heating and cooling cycles, are given. The ΔH is normalized by the sample weight.**

| Samples | T <sub>m1</sub> | ΔH <sub>m1</sub> | T <sub>m2</sub> | ΔH <sub>m2</sub> | T <sub>m3</sub> | ΔH <sub>m3</sub> | T <sub>c1</sub> | ΔH <sub>c1</sub> | T <sub>c2</sub> | ΔH <sub>c2</sub> |
|---------|-----------------|------------------|-----------------|------------------|-----------------|------------------|-----------------|------------------|-----------------|------------------|
| L       | NA              | NA               |
| HL      | 81.23           | -33.65           | NA              | NA               | NA              | NA               | 78.25           | 33.53            | NA              | NA               |
| GS      | 41.11           | -34.65           | 71.54           | -66.52           | 76.13           | -14.00           | 38.04           | 34.13            | 70.25           | 91.96            |

**Table S3. Thermal properties of oleogels. Thermal parameters of oleogels with the melting (T<sub>m</sub>) or crystallization (T<sub>c</sub>) temperatures (°C), as well as the corresponding difference in enthalpy ΔH (j/g), respecting the second heating and cooling cycles, are given. The ΔH is normalized by the sample weight.**

| Samples        | T <sub>m1</sub> | ΔH <sub>m1</sub> | T <sub>m2</sub> | ΔH <sub>m2</sub> | T <sub>m3</sub> | ΔH <sub>m3</sub> | T <sub>m4</sub> | ΔH <sub>m4</sub> | T <sub>m5</sub> | ΔH <sub>m5</sub> | T <sub>c1</sub> | ΔH <sub>c1</sub> | T <sub>c2</sub> | ΔH <sub>c2</sub> | T <sub>c3</sub> | ΔH <sub>c3</sub> | T <sub>c4</sub> | ΔH <sub>c4</sub> |
|----------------|-----------------|------------------|-----------------|------------------|-----------------|------------------|-----------------|------------------|-----------------|------------------|-----------------|------------------|-----------------|------------------|-----------------|------------------|-----------------|------------------|
| Corn oil       | -16.29          | -7.76            |                 |                  |                 |                  |                 |                  |                 |                  | -13.97          | 4.08             |                 |                  |                 |                  |                 |                  |
| GS             | -17.99          | -8.17            |                 |                  | 42.22           | -1.30            |                 |                  | 71.67           | -39.87           | -14.27          | 2.77             |                 |                  | 40.05           | 9.18             | 61.87           | 21.03            |
| GS-L (0.5%)    | -18.29          | -7.84            |                 |                  | 41.29           | -8.89            | 62.01           | -14.50           | 71.32           | -15.36           | -15.97          | 2.64             |                 |                  | 38.88           | 8.37             | 60.86           | 21.94            |
| GS-L (1.5%)    | -16.76          | -6.79            |                 |                  | 40.82           | -7.11            | 61.43           | -17.18           | 72.07           | -0.84            | -14.74          | 2.73             |                 |                  | 38.37           | 7.81             | 59.75           | 20.06            |
| GS-L (2.5%)    | -17.44          | -5.75            |                 |                  | 41.50           | -6.69            | 61.03           | -15.42           |                 |                  | -15.08          | 3.03             |                 |                  | 39.02           | 6.65             | 58.65           | 18.79            |
| GS-HL (0.5%)   | -16.97          | -6.77            |                 |                  | 40.10           | -8.19            | 62.70           | -3.64            | 71.99           | -17.36           |                 |                  |                 |                  | 37.50           | 6.37             | 61.39           | 20.18            |
| GS-HL (1.5%)   | -16.31          | -6.07            |                 |                  | 39.07           | -3.69            | 64.48           | -17.79           | 71.56           | -2.41            | -13.82          | 2.58             | 18.04           | 1.36             | 35.23           | 3.42             | 62.14           | 22.72            |
| GS-HL (2.5%)   | -16.71          | -5.99            | 13.34           | -0.73            | 39.10           | -2.62            | 65.48           | -18.35           | 71.26           | -1.52            | -14.54          | 2.86             | 12.79           | 1.27             | 34.86           | 3.16             | 63.21           | 21.32            |
| W-GS           | -18.93          | -7.93            |                 |                  | 42.73           | -1.20            |                 |                  | 71.82           | -39.89           |                 |                  | 30.76           | 1.21             | 40.04           | 5.41             | 61.03           | 21.84            |
| W-GS-L (0.5%)  | -17.19          | -5.51            |                 |                  | 42.29           | -8.59            | 62.58           | -14.11           | 72.42           | -14.23           | -14.98          | 2.89             | 30.04           | 1.5              | 39.66           | 5.60             | 61.13           | 21.40            |
| W-GS-L (1.5%)  | -16.66          | -5.28            |                 |                  | 40.96           | -7.74            | 62.29           | -18.06           | 72.70           | -1.11            | -14.72          | 2.96             | 25.38           | 0.99             | 38.69           | 5.57             | 60.39           | 20.56            |
| W-GS-L (2.5%)  | -17.96          | -5.83            |                 |                  | 41.43           | -6.67            | 61.09           | -16.11           |                 |                  | -14.31          | 3.28             | 25.94           | 0.90             | 39.06           | 4.98             | 58.33           | 18.89            |
| W-GS-HL (0.5%) | -16.29          | -5.44            |                 |                  | 39.70           | -10.64           |                 |                  | 71.34           | -30.37           | -14.51          | 2.92             | 20.03           | 0.28             | 37.17           | 5.23             | 60.99           | 21.59            |
| W-GS-HL (1.5%) | -15.36          | -5.18            | 17.26           | -0.58            | 39.17           | -3.46            | 64.62           | -14.78           | 71.56           | -3.92            | -14.34          | 2.99             | 18.62           | 1.68             | 35.56           | 3.51             | 61.99           | 22.53            |
| W-GS-HL (2.5%) | -17.19          | -5.11            | 13.56           | -0.68            | 38.44           | -2.97            | 65.28           | -19.47           |                 |                  | -14.16          | 2.49             | 13.23           | 1.36             | 33.98           | 2.87             | 62.60           | 23.13            |

**Table S4. Maximum hardness of oleogels. The oleogels were formulated with corn oil, glyceryl stearate (GS), varying concentrations of lecithin (L) or hydrogenated lecithin (HL), beta-carotene ( $\beta$ C), and water (W).**

| <b>Oleogels</b>          | <b>Maximum Hardness (N)</b> |
|--------------------------|-----------------------------|
| GS                       | 1.42 $\pm$ 0.08             |
| GS-L (0.5%)              | 0.36 $\pm$ 0.01             |
| GS-L (1%)                | 0.17 $\pm$ 0.01             |
| GS-L (1.5%)              | 0.19 $\pm$ 0.01             |
| GS-L (2%)                | 0.29 $\pm$ 0.01             |
| GS-L (2.5%)              | 0.28 $\pm$ 0.02             |
| GS-HL (0.5%)             | 1.11 $\pm$ 0.09             |
| GS-HL (1%)               | 1.35 $\pm$ 0.01             |
| GS-HL (1.5%)             | 1.62 $\pm$ 0.01             |
| GS-HL (2%)               | 1.84 $\pm$ 0.01             |
| GS-HL (2.5%)             | 2.10 $\pm$ 0.02             |
| W-GS                     | 1.98 $\pm$ 0.28             |
| W-GS-L (0.5%)            | 1.93 $\pm$ 0.07             |
| W-GS-L (1%)              | 1.06 $\pm$ 0.12             |
| W-GS-L (1.5%)            | 0.47 $\pm$ 0.29             |
| W-GS-L (2%)              | 0.51 $\pm$ 0.22             |
| W-GS-L (2.5%)            | 0.43 $\pm$ 0.19             |
| W-GS-HL (0.5%)           | 2.33 $\pm$ 0.06             |
| W-GS-HL (1%)             | 2.16 $\pm$ 0.10             |
| W-GS-HL (1.5%)           | 2.07 $\pm$ 0.23             |
| W-GS-HL (2%)             | 2.18 $\pm$ 0.51             |
| W-GS-HL (2.5%)           | 1.88 $\pm$ 0.03             |
| $\beta$ C-GS             | 2.28 $\pm$ 0.02             |
| $\beta$ C-GS-L (0.5%)    | 1.90 $\pm$ 0.01             |
| $\beta$ C-GS-L (2.5%)    | 0.36 $\pm$ 0.01             |
| $\beta$ C-GS-HL (0.5%)   | 2.07 $\pm$ 0.01             |
| $\beta$ C-GS-HL (2.5%)   | 1.02 $\pm$ 0.00             |
| $\beta$ C-W-GS           | 2.09 $\pm$ 0.16             |
| $\beta$ C-W-GS-L (0.5%)  | 0.65 $\pm$ 0.03             |
| $\beta$ C-W-GS-L (2.5%)  | 0.26 $\pm$ 0.02             |
| $\beta$ C-W-GS-HL (0.5%) | 1.45 $\pm$ 0.00             |
| $\beta$ C-W-GS-HL (2.5%) | 2.43 $\pm$ 0.14             |

**Table S5. Oil binding capacity of oleogels is expressed as a percentage of the total oil used in formulation after centrifugation (9000 rpm, 30 min, 25 °C). The oleogels were formulated with corn oil, glyceryl stearate (GS), beta-carotene (βC), water (W), and varying concentrations of lecithin (L) or hydrogenated**

| Oleogel      | Without W and βC              | With W                        | With βC                     | With W and βC                |
|--------------|-------------------------------|-------------------------------|-----------------------------|------------------------------|
| GS           | 99.125 ± 0.759 <sup>abc</sup> | 99.937 ± 0.019 <sup>a</sup>   | 99.962 ± 0.022 <sup>a</sup> | 99.659 ± 0.227 <sup>ab</sup> |
| GS-L (0.5%)  | 94.320 ± 1.121 <sup>e</sup>   | 99.936 ± 0.037 <sup>a</sup>   | 99.995 ± 0.007 <sup>a</sup> | 97.789 ± 0.257 <sup>d</sup>  |
| GS-L (1.0%)  | 74.917 ± 0.406 <sup>k</sup>   | 98.755 ± 0.188 <sup>bcd</sup> | NA                          | NA                           |
| GS-L (1.5%)  | 76.697 ± 1.110 <sup>j</sup>   | 98.648 ± 1.136 <sup>cd</sup>  | NA                          | NA                           |
| GS-L (2%)    | 91.776 ± 1.389 <sup>f</sup>   | 91.228 ± 1.560 <sup>f</sup>   | NA                          | NA                           |
| GS-L (2.5%)  | 89.435 ± 0.280 <sup>g</sup>   | 81.065 ± 0.884 <sup>i</sup>   | 94.293 ± 1.232 <sup>e</sup> | 83.222 ± 0.647 <sup>h</sup>  |
| GS-HL (0.5%) | 100.034 ± 0.019 <sup>a</sup>  | 99.728 ± 0.184 <sup>ab</sup>  | 99.946 ± 0.030 <sup>a</sup> | 99.968 ± 0.017 <sup>a</sup>  |
| GS-HL (1%)   | 99.974 ± 0.025 <sup>a</sup>   | 99.742 ± 0.372 <sup>ab</sup>  | NA                          | NA                           |
| GS-HL (1.5%) | 100.066 ± 0.041 <sup>a</sup>  | 99.898 ± 0.154 <sup>a</sup>   | NA                          | NA                           |
| GS-HL (2%)   | 100.003 ± 0.031 <sup>a</sup>  | 99.984 ± 0.016 <sup>a</sup>   | NA                          | NA                           |
| GS-HL (2.5%) | 99.971 ± 0.020 <sup>a</sup>   | 100.050 ± 0.078 <sup>a</sup>  | 99.773 ± 0.115 <sup>a</sup> | 100.032 ± 0.021 <sup>a</sup> |

lecithin (HL).

\* Different lower case letters indicate significant differences ( $p < 0.05$ ) between the oleogels based on the Least Squares Means (LSM) differences Student's t-test.

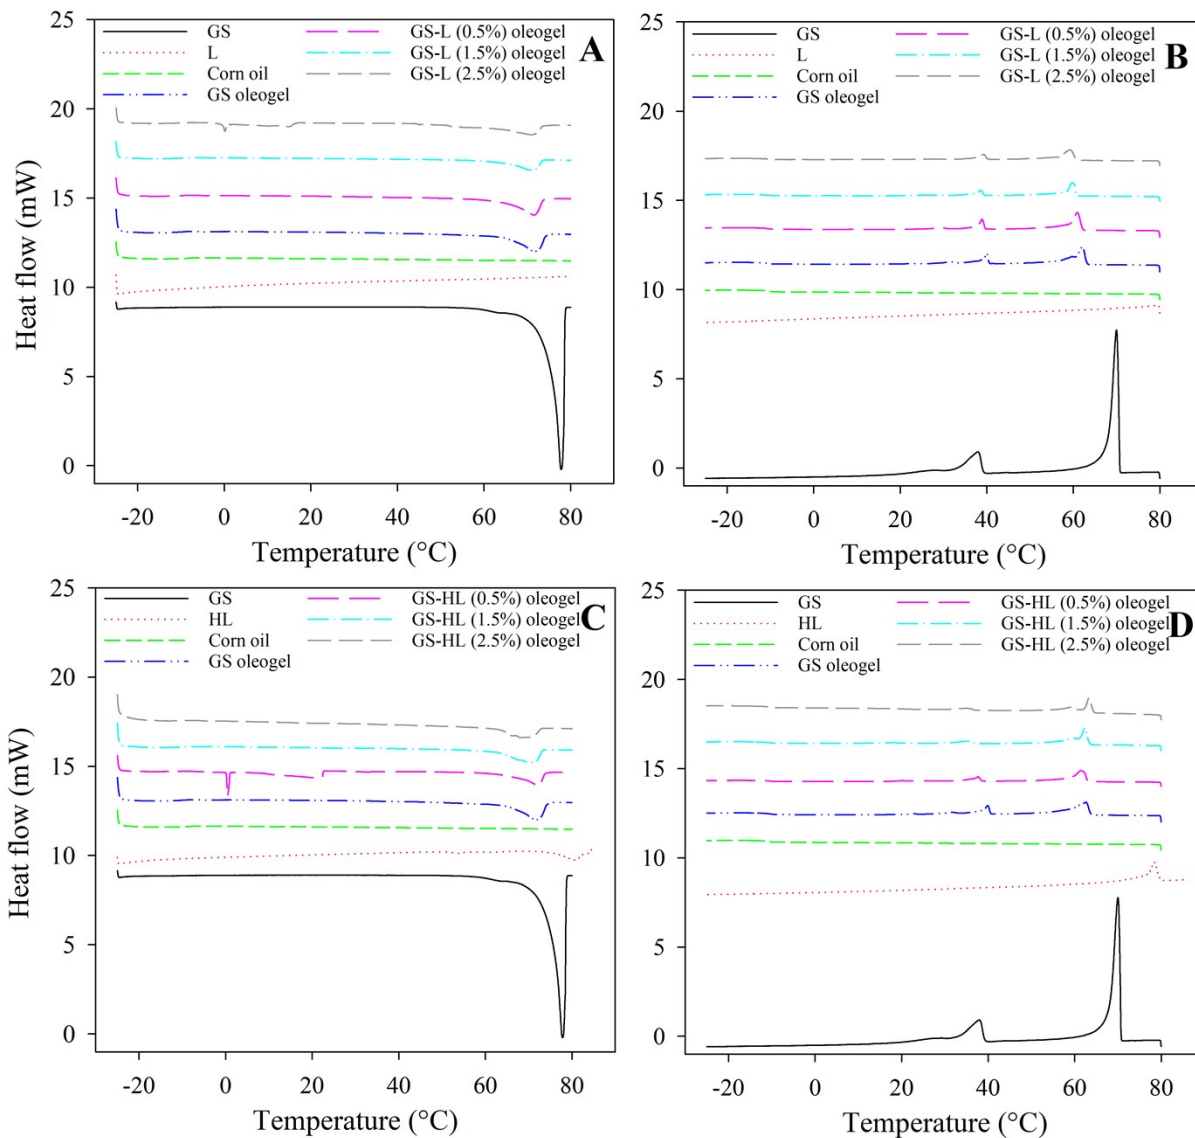

**Figure S1.** DSC profiles of the neat lecithin (L), neat hydrogenated lecithin (HL), neat glyceryl stearate (GS), liquid corn oil and corn oil-based oleogels containing GS, lecithin or hydrogenated lecithin at concentrations of 0.5, 1.5 and 2.5% (w/w) with first heating cycles for lecithin-containing oleogels (A) and hydrogenated lecithin-containing oleogels (C), and first cooling cycles for lecithin-containing oleogels (B) and hydrogenated lecithin-containing oleogels (D).
